# Supplementary material for: Selective Sweeps in Cattle Genomes in Response to the Influence of Urbanization and Environmental Contamination
Source: MDPI journal article supplement (doi:10.3390/genes14112083), 2023-11-15
Supplement: s1 [file s1]

## Supplementary Materials:

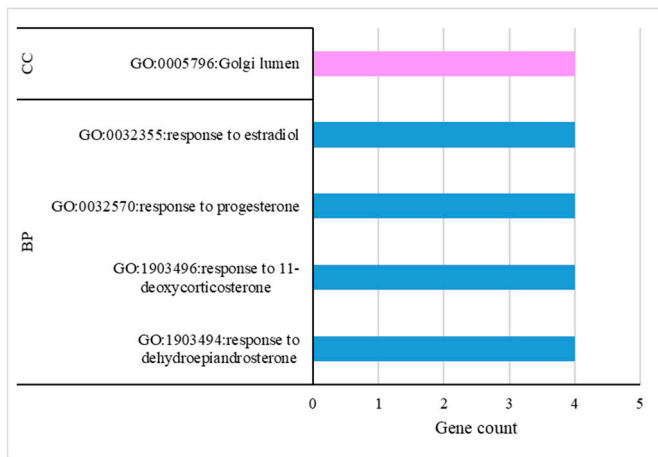

(a)

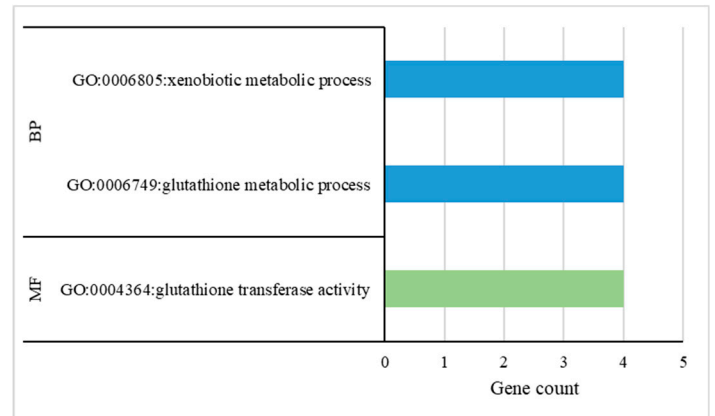

(b)

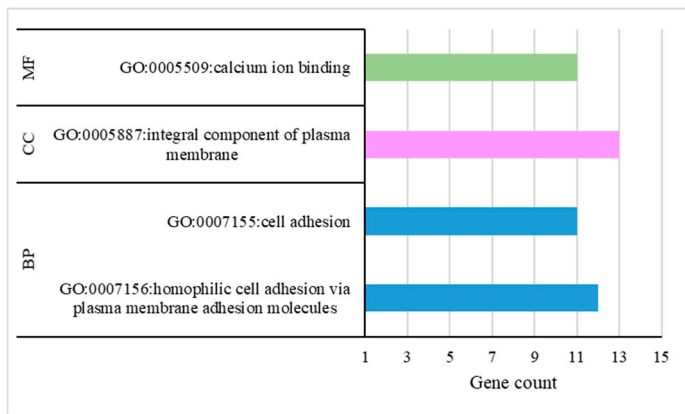

(c)

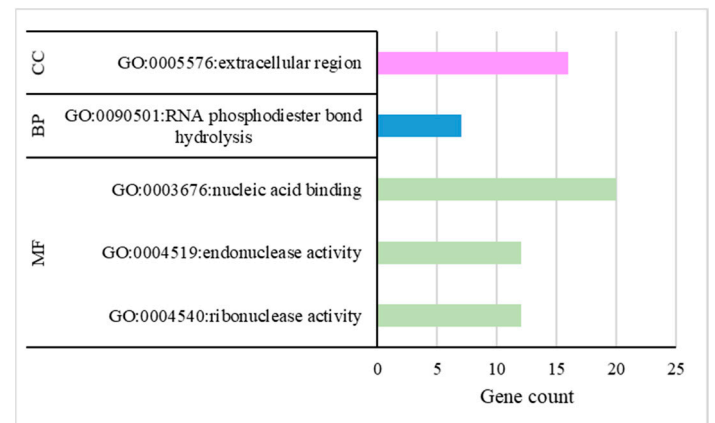

(d)

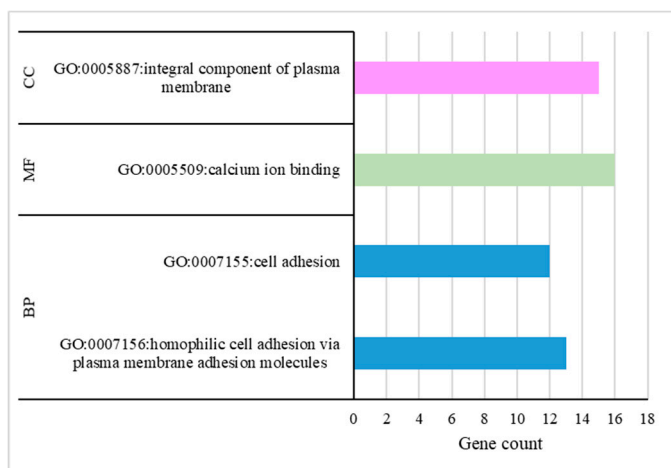

(e)

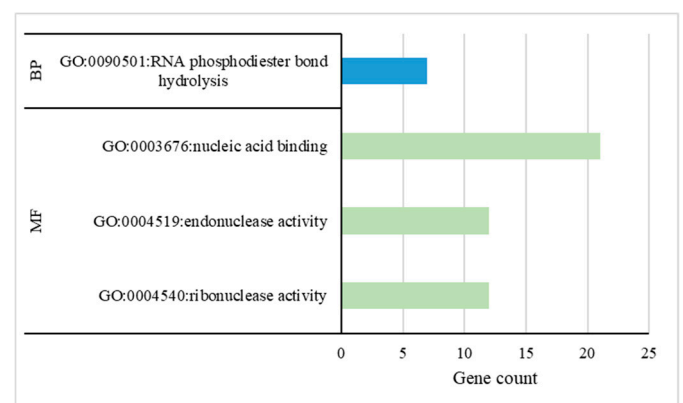

(f)

**Supplementary Figure S1.** Functional annotation clustering of the gene ontology terms (BP: Biological process, CC: Cellular Component and MF: Molecular Functions) for the selection sweeps for urban\_vs\_rural (positive (a), negative (b)), urban\_vs\_mixed (positive (c), negative (d)) and rural\_vs\_mixed (positive (e), negative (f)) comparisons.

**Supplementary Table S1:** Details of genes that were common for urban\_rural, urban\_mixed and rural\_mixed selection signature comparisons

| Ensemble Gene ID   | Gene Name                                                       |
|--------------------|-----------------------------------------------------------------|
| ENSBTAG00000006620 | solute carrier family 24 member 4( <i>SLC24A4</i> )             |
| ENSBTAG00000010416 | Ras and Rab interactor 3( <i>RIN3</i> )                         |
| ENSBTAG00000010758 | small integral membrane protein 5( <i>SMIM5</i> )               |
| ENSBTAG00000011713 | Myosin XVB ( <i>A0A3Q1M5U4_BOVIN</i> )                          |
| ENSBTAG00000011715 | RecQ like helicase 5( <i>RECQL5</i> )                           |
| ENSBTAG00000011717 | SAP30 binding protein( <i>SAP30BP</i> )                         |
| ENSBTAG00000014248 | MIER family member 3( <i>MIER3</i> )                            |
| ENSBTAG00000014964 | galactokinase 1( <i>GALK1</i> )                                 |
| ENSBTAG00000018169 | integrin subunit beta 4( <i>ITGB4</i> )                         |
| ENSBTAG00000020067 | LLGL scribble cell polarity complex component 2( <i>LLGL2</i> ) |
| ENSBTAG00000024909 | H3.3 histone B( <i>H3-3B</i> )                                  |
| ENSBTAG00000047510 | small integral membrane protein 6( <i>SMIM6</i> )               |
| ENSBTAG00000051466 | unc-51 like kinase 4( <i>ULK4</i> )                             |
